# Supplementary material for: Atomistic and coarse-grained simulations reveal increased ice nucleation activity on silver iodide surfaces in slit and wedge geometries
Source: Copernicus journal article supplement (doi:10.5194/acp-22-10099-2022), 2022-08-08
Supplement: Supplementary file 1 [file acp-22-10099-2022-supplement.pdf]

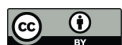

*Supplement of*

## **Atomistic and coarse-grained simulations reveal increased ice nucleation activity on silver iodide surfaces in slit and wedge geometries**

**Golnaz Roudsari et al.**

*Correspondence to:* Golnaz Roudsari (golnaz.roudsari@helsinki.fi)

The copyright of individual parts of the supplement might differ from the article licence.

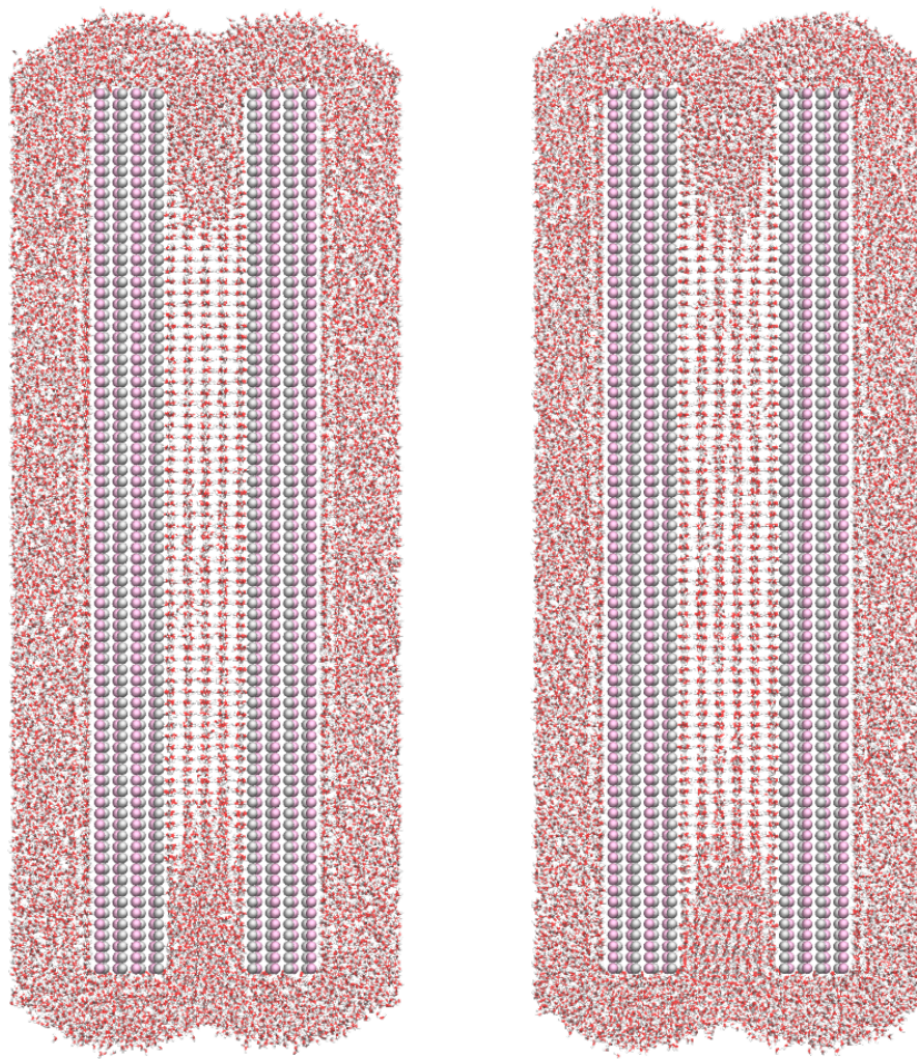

**Figure S1.** Snapshots of the final configurations of ice nucleation simulations at  $T = 263$  K using the TIP4P/Ice water model in AgI slit systems with a gap width of 5 (left) and 6 (right) ice bilayers. Ag and I are shown in silver and pink, respectively, and water molecules are shown as red and white sticks. In both systems, ice cannot grow close to the slab edges.

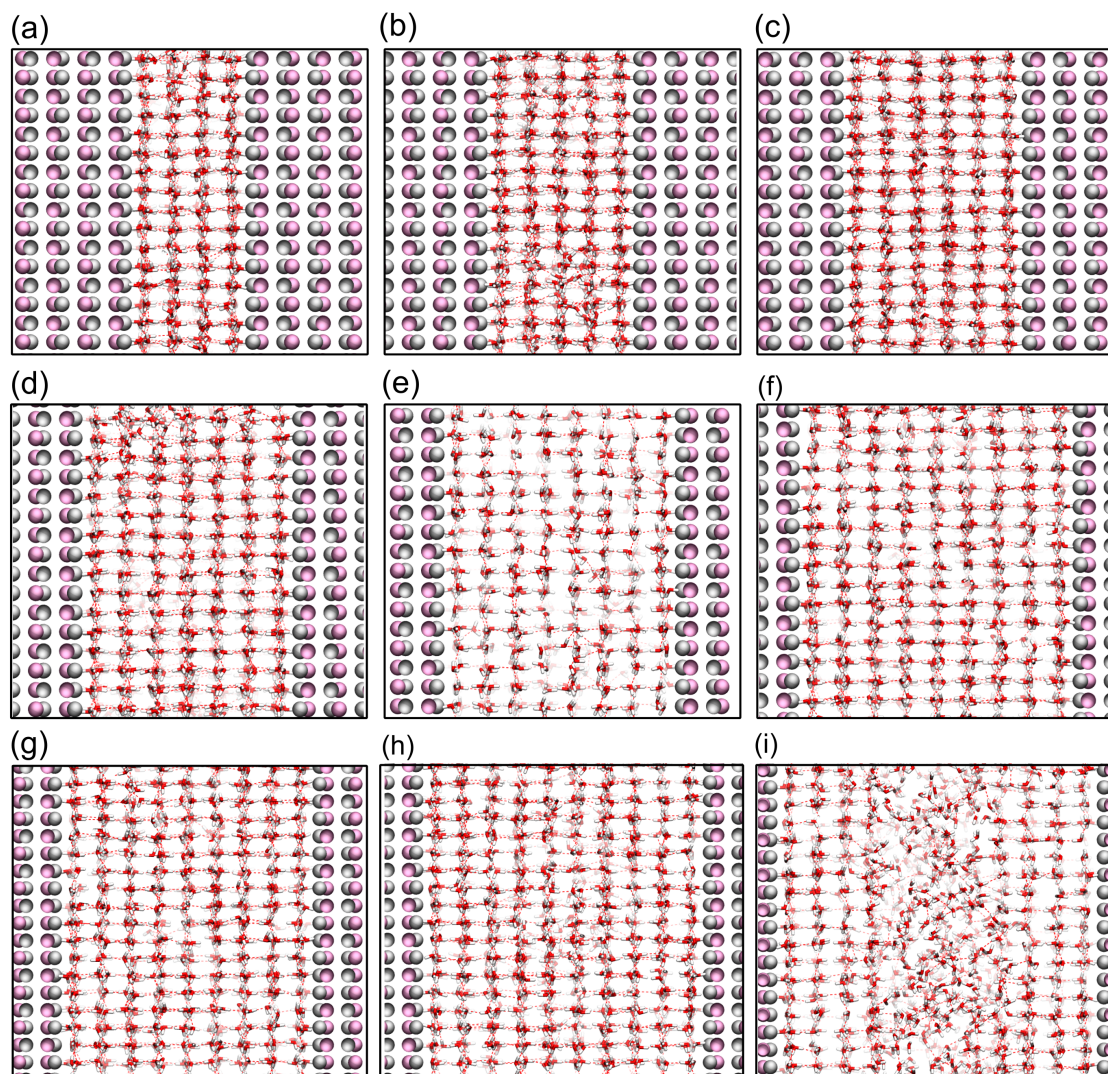

**Figure S2.** Snapshot details of the last frame of TIP4P/Ice simulations at 265 K for AgI slit systems with gap widths of (a) 4 ice bilayers, (b) 5 ice bilayers, (c) 6 ice bilayers, (d) 7 ice bilayers, (e) 8 ice bilayers, (f) 9 ice bilayers, (g) 10 ice bilayers, (h) 11 ice bilayers and (i) 12 ice bilayers. Ag and I are shown in silver and pink, respectively, and water molecules are shown as red and white sticks.



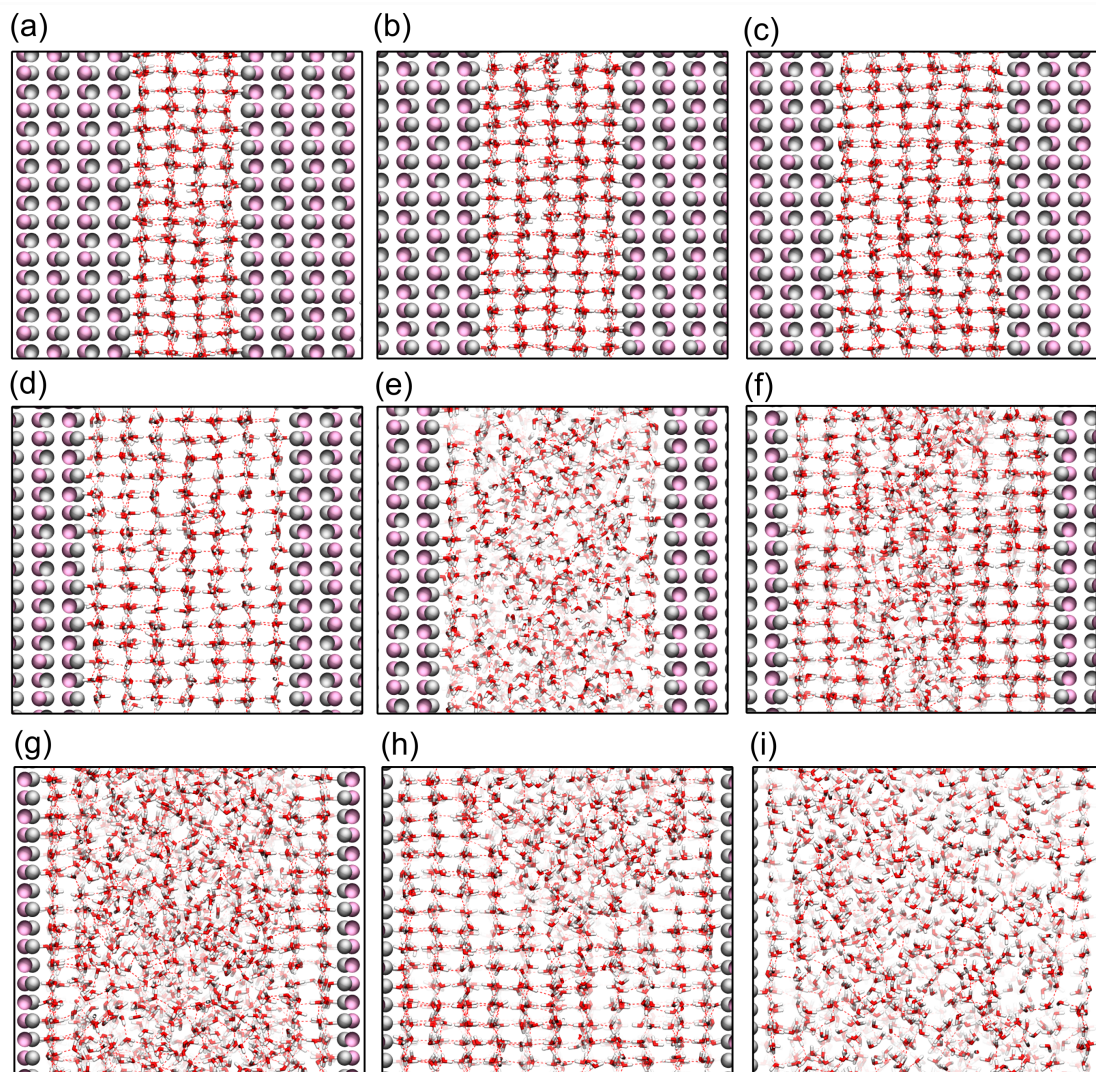

**Figure S3.** Snapshot details of the last frame of TIP4P/Ice simulations at 267 K for AgI slit systems with gap widths of (a) 4 ice bilayers, (b) 5 ice bilayers, (c) 6 ice bilayers, (d) 7 ice bilayers, (e) 8 ice bilayers, (f) 9 ice bilayers, (g) 10 ice bilayers, (h) 11 ice bilayers and (i) 12 ice bilayers. Ag and I are shown in silver and pink, respectively, and water molecules are shown as red and white sticks.



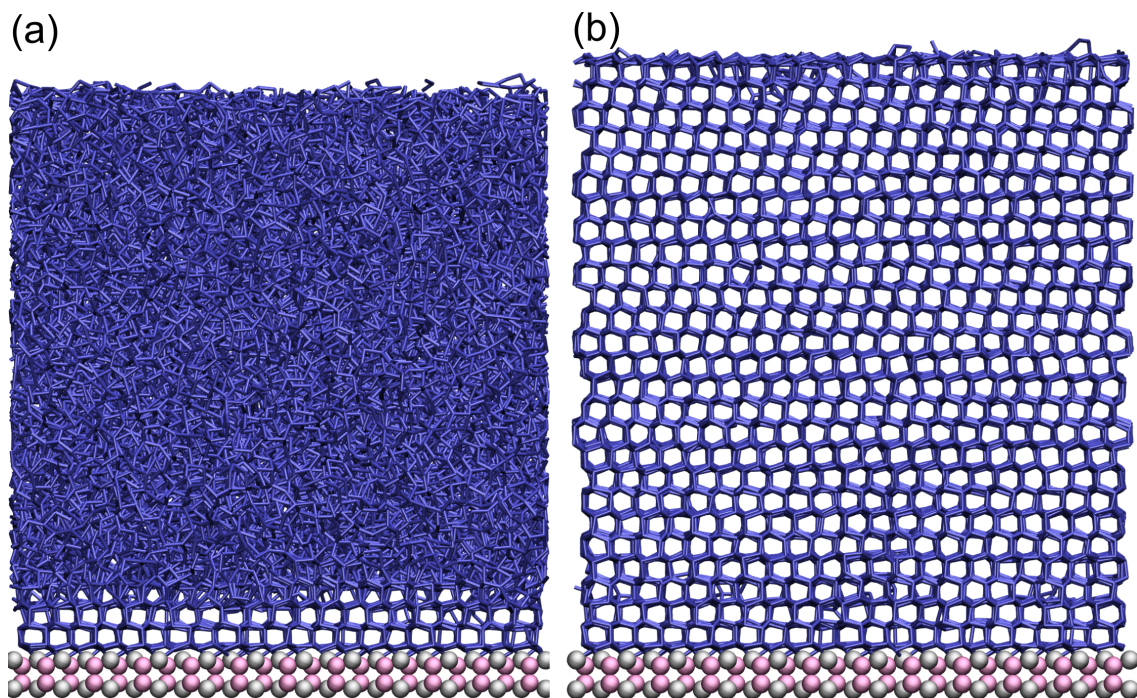

**Figure S4.** Simulation snapshot details of maximum ice growth observed in ice nucleation simulations on the flat AgI(0001) surface using the mW model (a) at  $T = 263$  K in 60 ns, and (b) at 262 K in 20 ns. Ag and I are colored in silver and pink, respectively, and the hydrogen bond network between mW water molecules is indicated by blue sticks.

**Table S1.** Number of water molecules and simulation box dimensions used in ice nucleation simulations on wedge systems using the TIP4P/Ice water model

| Systems   | Number of water molecules | box size nm <sup>3</sup>      |
|-----------|---------------------------|-------------------------------|
| $W^{30}$  | 8883                      | $9.45 \times 7.33 \times 25$  |
| $W^{45}$  | 17440                     | $14.51 \times 7.33 \times 25$ |
| $W^{60}$  | 19840                     | $23.95 \times 7.33 \times 25$ |
| $W^{70}$  | 8338                      | $9.87 \times 7.33 \times 20$  |
| $W^{73}$  | 8342                      | $10.50 \times 7.33 \times 20$ |
| $W^{110}$ | 8068                      | $11.87 \times 7.33 \times 20$ |
| $W^{120}$ | 7957                      | $12.35 \times 7.33 \times 20$ |

$W^{110}$

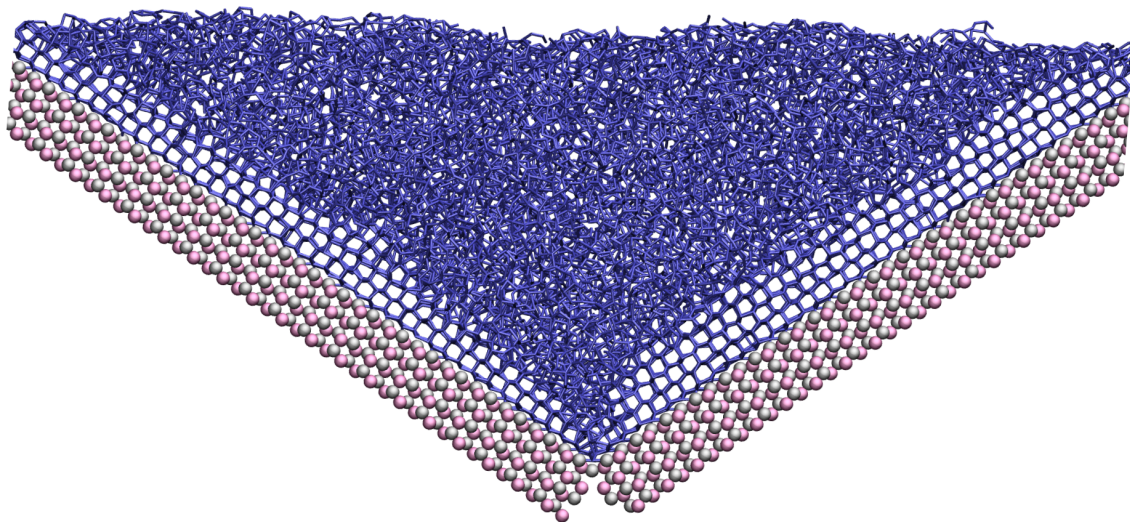

$W^{120}$

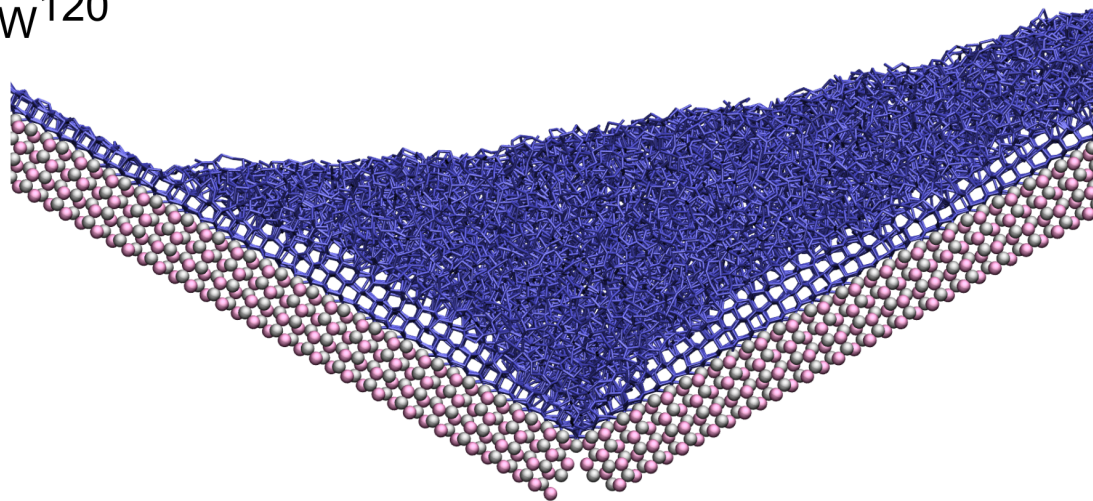

**Figure S5.** Simulation snapshot details of the last frame ( $t = 150$  ns) for wedge systems  $W^{110}$  (top) and  $W^{120}$  (bottom) at  $T = 263$  K, using the mW model. Ag and I are colored in silver and pink, respectively, and the hydrogen bond network between mW water molecules is indicated by blue sticks.



W110

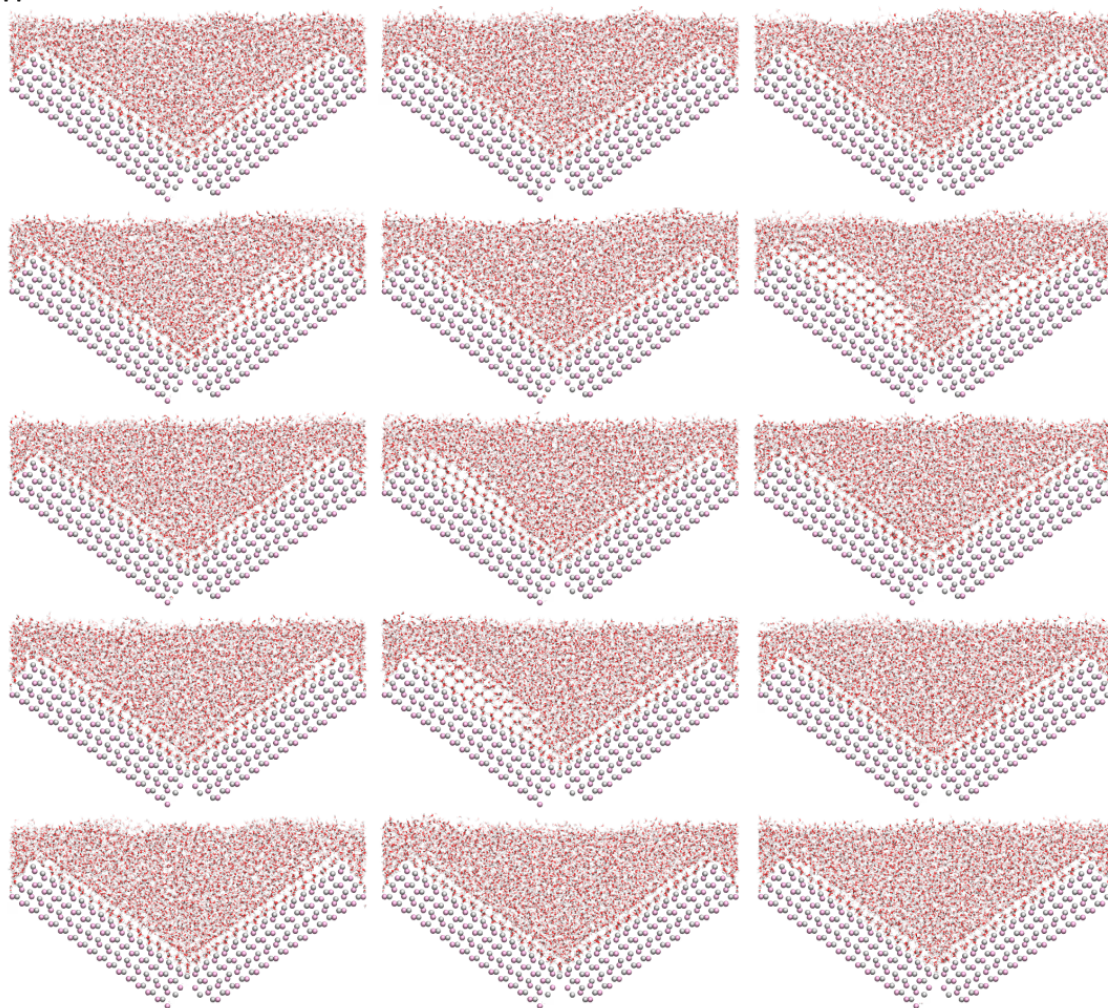

**Figure S6.** Simulation snapshot details of the last frames of 15 independent simulations of wedge systems  $W^{110}$  at  $T = 263$  K using the TIP4P/Ice model. Ag and I are shown in silver and pink, respectively, and water molecules are shown as red and white sticks.

$W^{120}$

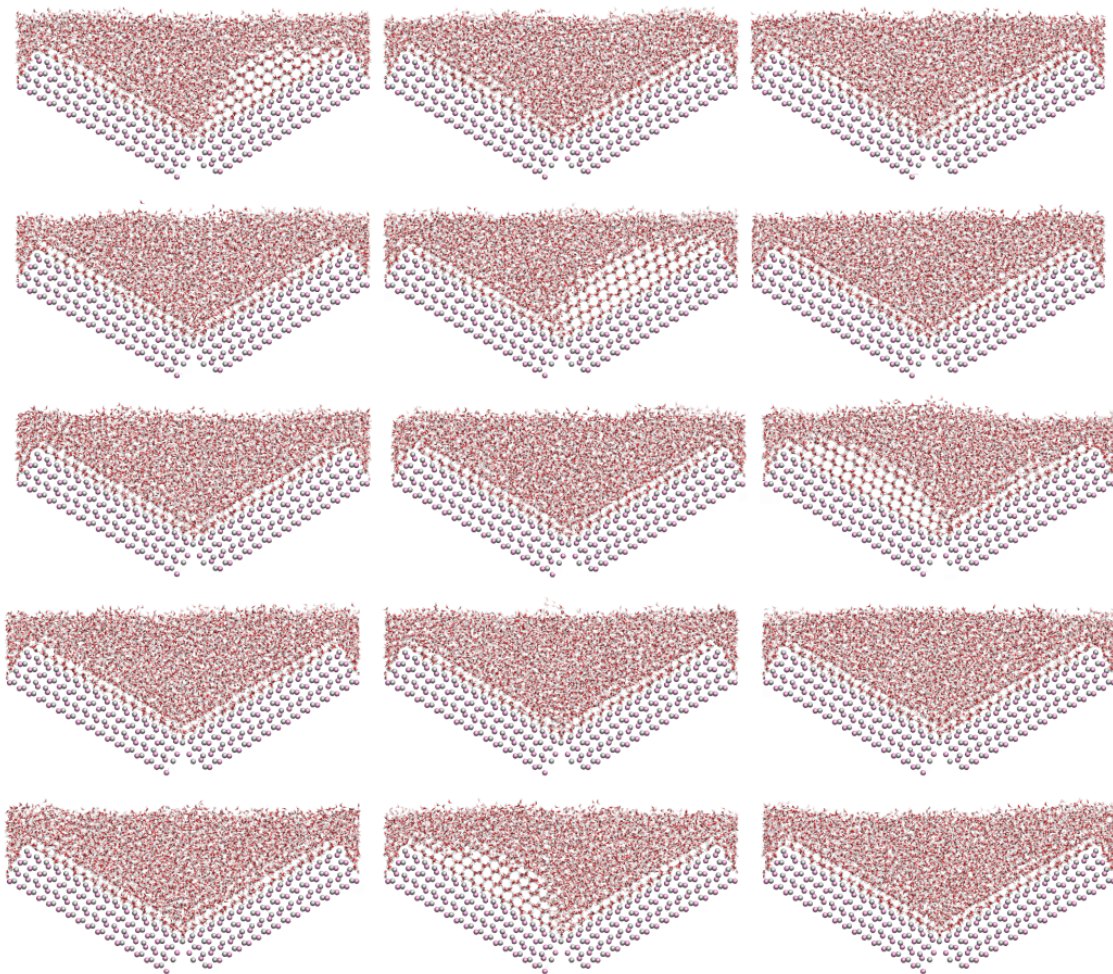

**Figure S7.** Simulation snapshot details of the last frames of 15 independent simulations of wedge systems  $W^{120}$  at  $T = 263$  K using the TIP4P/Ice model. Ag and I are shown in silver and pink, respectively, and water molecules are shown as red and white sticks.



**Table S2.** Number of water molecules and simulation box dimensions used in ice nucleation simulations on wedge systems using the mW water model

| Systems               | Number of water molecules | box size nm <sup>3</sup>         |
|-----------------------|---------------------------|----------------------------------|
| $W^{30}$              | 17766                     | $9.54 \times 7.33 \times 18$     |
| $W^{32}$              | 63661                     | $17.99 \times 10.08 \times 29$   |
| $W^{45}$              | 17440                     | $14.54 \times 7.33 \times 15.4$  |
| $W^{60}$              | 30775                     | $24 \times 7.33 \times 17$       |
| $W^{62}$              | 63280                     | $22.48 \times 10.08 \times 16.1$ |
| $W^{70}$              | 18056                     | $19.1 \times 7.33 \times 15$     |
| $W_{outgrowing}^{70}$ | 72236                     | $19.1 \times 7.33 \times 33.5$   |
| $W^{73}$              | 19205                     | $19.5 \times 7.33 \times 15$     |
| $W_{outgrowing}^{73}$ | 77784                     | $22.97 \times 7.33 \times 27$    |
| $W^{110}$             | 33009                     | $31.4 \times 7.33 \times 15$     |
| $W^{120}$             | 22824                     | $30.1 \times 7.33 \times 13$     |

**Table S3.** Induction times for ice nucleation (ns) for 15 independent simulations of different AgI wedge systems at temperatures 263 K, 265 K and 267 K using the TIP4P/Ice water model. Dashes (-) indicate *no nucleation* event within 150 ns.

| Systems   | T (K) | Simulations |     |     |    |    |     |     |    |    |     |     |     |    |    |     |
|-----------|-------|-------------|-----|-----|----|----|-----|-----|----|----|-----|-----|-----|----|----|-----|
|           |       | 1           | 2   | 3   | 4  | 5  | 6   | 7   | 8  | 9  | 10  | 11  | 12  | 13 | 14 | 15  |
| $W^{30}$  | 263   | 15          | 63  | 22  | 24 | 5  | 8   | 14  | 25 | 26 | 21  | 4   | 2   | 63 | 66 | 4   |
|           | 265   | 95          | 50  | 122 | -  | -  | 116 | 132 | 12 | 54 | 119 | 18  | 85  | 93 | 30 | -   |
|           | 267   | -           | -   | -   | -  | -  | -   | -   | -  | -  | -   | -   | -   | -  | -  | -   |
| $W^{45}$  | 263   | 74          | 5   | 34  | 59 | 99 | 61  | 49  | 3  | 83 | 61  | 9   | 62  | 59 | 22 | 47  |
|           | 265   | -           | -   | -   | -  | -  | -   | -   | -  | -  | -   | 110 | -   | -  | -  | -   |
|           | 267   | -           | -   | -   | -  | -  | -   | -   | -  | -  | -   | -   | -   | -  | -  | -   |
| $W^{60}$  | 263   | 2           | 3   | 7   | 2  | 2  | 4   | 4   | 3  | 3  | 3   | 9   | 19  | 3  | 2  | 5   |
|           | 265   | 12          | 10  | 6   | 23 | 3  | 26  | 4   | 9  | 8  | 6   | 8   | 12  | 9  | 7  | 3   |
|           | 267   | 11          | 5   | 2   | 5  | 9  | 4   | 3   | 3  | 4  | 2   | 5   | 3   | 6  | 27 | 7   |
| $W^{70}$  | 263   | -           | 121 | -   | -  | -  | 82  | 86  | -  | 11 | -   | -   | 9   | -  | -  | 87  |
|           | 265   | -           | -   | 78  | -  | -  | -   | -   | -  | -  | -   | -   | -   | -  | -  | -   |
|           | 267   | -           | -   | -   | -  | -  | -   | -   | -  | -  | -   | -   | -   | -  | -  | -   |
| $W^{73}$  | 263   | 10          | 28  | 10  | 32 | 8  | 5   | 18  | 51 | 45 | 9   | 86  | 28  | 11 | 18 | 40  |
|           | 265   | 20          | 43  | 7   | -  | 17 | 3   | 59  | -  | -  | 74  | 61  | 37  | 15 | 13 | 119 |
|           | 267   | -           | -   | 129 | -  | -  | -   | 133 | -  | -  | -   | -   | -   | -  | -  | -   |
| $W^{110}$ | 263   | -           | -   | -   | -  | 17 | 120 | -   | -  | -  | -   | -   | 134 | -  | -  | 129 |
|           | 265   | -           | -   | -   | -  | -  | -   | -   | -  | -  | -   | -   | -   | -  | -  | -   |
|           | 267   | -           | -   | -   | -  | -  | -   | -   | -  | -  | -   | -   | -   | -  | -  | -   |
| $W^{120}$ | 263   | -           | -   | 66  | -  | -  | 7   | -   | -  | -  | 44  | -   | -   | -  | -  | -   |
|           | 265   | -           | -   | -   | -  | -  | -   | -   | -  | -  | -   | -   | -   | -  | -  | -   |
|           | 267   | -           | -   | -   | -  | -  | -   | -   | -  | -  | -   | -   | -   | -  | -  | -   |



**Table S4.** Fraction of simulations exhibiting an ice nucleation event for different AgI wedge systems at temperatures 265 K and 267 K using the mW water model.

| Systems  | T (K) | Number of nucleation events |
|----------|-------|-----------------------------|
| $W^{30}$ | 265   | 15/15                       |
|          | 267   | 0/15                        |
| $W^{32}$ | 265   | 15/15                       |
|          | 267   | 0/15                        |
| $W^{62}$ | 265   | 15/15                       |
|          | 267   | 0/15                        |
| $W^{70}$ | 265   | 15/15                       |
|          | 267   | 15/15                       |
| $W^{73}$ | 265   | 12/15                       |
|          | 267   | 0/15                        |
